# Supplementary material
Source: ML conference proceedings conference paper supplement (https://proceedings.mlr.press/v84/gruber18a.html)
Supplement: Supplementary file [file gruber18a-supp.pdf]

---

# Supplementary material for AISTATS submission: Factorial HMM with Collapsed Gibbs Sampling for optimizing long-term HIV Therapy

---

Amit Gruber<sup>1,†</sup>, Chen Yanover<sup>1</sup>, Tal El-Hay<sup>1</sup>, Anders Sönnnerborg<sup>2</sup>  
 Vanni Borghi<sup>3</sup>, Francesca Incardona<sup>4</sup>, Yaara Goldschmidt<sup>1</sup>

<sup>1</sup>IBM Research                      <sup>2</sup>Karolinska Institute                      <sup>3</sup>Modena University Hospital                      <sup>4</sup>EuResist Network GEIE  
 Haifa Research Lab                      Karolinska University Hospital                      InformaPro S.r.l.

## A Appendix: Collapsed Gibbs Sampling for Factorial HMM

Let  $q_{t,m}, t = 1 \dots T, m = 1 \dots M$  be the hidden state of the  $m$ 'th chain of a factorial HMM with  $M$  chains at time  $t$  and let  $O_t$  be the observation at that time. At each step, a single state  $q_{t,m}$  is sampled given all the other states. Let  $C_{q,q'}^m$  be the count of states  $q$  and  $q'$  at times  $t$  and  $t + 1$  respectively in chain  $m$  excluding the variable to be sampled, and let  $C_{q_1, \dots, q_M, o}$  the count of the combination of states  $q_1, \dots, q_M$  with outcome  $o$  (a potentially exponentially large table). Let  $\alpha$  and  $\beta$  are Symmetric Dirichlet priors on the chain specific transition matrix and the emission matrix respectively. The sampling equations for  $1 < t < T$  are:

$$\Pr(q_{t,m} | q_{-(t,m)}, o_t, \alpha, \beta) \propto \left[ \frac{C_{q_{t,m}, q_{t-1,m}}^m + \alpha}{\sum_q C_{q, q_{t-1,m}}^m + Q\alpha} \right] (1)$$

$$\left[ \frac{C_{q_{t+1,m}, q_{t,m}}^m + \alpha}{\sum_q C_{q_{t+1,m}, q}^m + Q\alpha} \right] \left[ \frac{C_{q_{t,m}, o_t} + \beta}{\sum_o C_{q_{t,m}, o} + O\beta} \right]$$

where  $Q$  is the number of states and  $O$  is the number of possible outcomes. For  $t = 1$  the first term is replaced with 1 and for  $t = T$  the second term is replaced with 1.

Computationally, this algorithm is practical only when the dependency between  $O_t$  and the states  $q_{t, \cdot}$  has some compact form, for example when  $O_t$  depends on only a few of these states at a time like in FResist or in [Dong et al., 2012], or when this dependence has some functional form (like in FResist).

The parameters  $\Pr(q_{t+1} | q_t)$  and  $\Pr(o_t | q_t^1 \dots q_t^M)$  can be estimated by:

$$\Pr(q_{t+1} | q_t, m) = \frac{C_{q_{t+1}, q_t}^m + \alpha}{\sum_q C_{q', q_t}^m + Q\alpha} \quad (2)$$

$$\Pr(O | q_1 \dots q_M) = \frac{C_{q_{t, \cdot}, O} + \beta}{\sum_o C_{q_{t, \cdot}, o} + O\beta} \quad (3)$$

---

<sup>†</sup>Current affiliation: Facebook Inc.

## References

[Dong et al., 2012] Dong, W., Heller, K., and Pentland, A. (2012). Graph-coupled hmms for modeling the spread of infection. In *Uncertainty in Artificial Intelligence*.
